# Supplementary material for: Quercetin and silibinin ameliorate insulin resistance by stimulating fat browning via the β3-AR/AMPK pathway in palmitate-exposed 3T3-F442A adipocytes
Source: Research Square preprint supplement (doi:10.21203/rs.3.rs-7124697/v1), 2025-08-05
Supplement: Supplementary file 1 [file 290d228e85ee79c6aa85c383.xlsx]

## Sheet: Figure 1a
Control	0	5	10	20	40	80	160
105.156	61.7563	66.2847	88.0344	89.4888	103.405	79.5394	78.052
97.8184	60.8308	65.26	87.1089	89.621	102.843	79.0767	73.4905
97.0251	56.3023	64.8634	79.0767	89.654	100.76	78.9775	71.4742

## Sheet: Figure 1b
Control	0	5	10	20	40	80	160
107.366	66.499	69.0035	75.2649	86.728	98.0948	107.696	86.3106
98.6244	64.8293	65.5036	68.9393	72.0218	97.0994	102.109	84.673
94.01	63.4807	65.2467	65.7926	71.2833	90.2601	99.0902	84.4161

## Sheet: Figure 1c
Control	PA	PA+QC	PA+SLB
99.857	67.7353	100.224	86.1171
99.8116	70.8145	96.3506	80.0109
100.331	69.7149	106.207	85.3175

## Sheet: Figure 1d
Control	PA	PA+QC	PA+SLB
99.6057	84.3552	117.776	109.888
100.679	87.2348	118.309	107.858
99.7157	83.4046	116.365	112.313

## Sheet: Figure 2b
Control	PA	PA+QC	PA+SLB
96.9782	112.056	80.7788	81.3707
101.09	112.617	81.5265	80.7788
102.274	113.24	81.9003	83.4268

## Sheet: Figure 2d
Tfam							Nrf1
Control	PA	PA+QC	PA+SLB				Control	PA	PA+QC	PA+SLB
0.937451	0.502651	2.71681	3.05597				0.912773	0.586465	2.09199	1.89921
0.972275	0.637274	2.56126	1.82982				0.986377	0.739824	2.03954	1.91967
1.09714	0.512884	1.70481	2.86108				1.11069	0.739847	3.28123	1.30983

## Sheet: Figure 3a
Tmem26						Tbx1						CD137						Cited 1
Control	PA	PA+QC	PA+SLB			Control	PA	PA+QC	PA+SLB			Control	PA	PA+QC	PA+SLB			Control	PA	PA+QC	PA+SLB
0.873439	0.450953	1.38371	2.15869			1.10422	0.594042	3.0018	1.46704			0.870208	0.790823	2.037	2.79501			0.833615	0.879228	1.80133	1.11651
1.04844	0.605335	1.167	1.65519			1.0087	0.609494	3.03618	2.50386			0.938514	0.81882	2.08671	2.18219			0.98828	0.86815	1.31399	1.27386
1.09201	0.860514	1.3498	1.9783			0.897802	0.820805	3.67296	2.92777			1.22444	0.839712	1.33248	2.30501			1.21382	0.766738	1.75714	1.29688

## Sheet: Figure 3b
PGC-1α						PRDM16						UCP-1
Control	PA	PA+QC	PA+SLB			Control	PA	PA+QC	PA+SLB			Control	PA	PA+QC	PA+SLB
0.916246	0.754812	1.32196	1.55244			0.834652	0.747259	1.45307	1.10926			0.7309	0.533564	1.51378	1.46141
0.983863	0.590204	1.0816	1.6744			1.08645	0.753005	0.92087	0.928139			1.11131	0.719128	1.6048	1.56268
1.10931	0.494907	1.68965	1.42458			1.10277	0.503107	1.35787	1.31731			1.23114	0.474878	1.72789	1.60782

## Sheet: Figure 3c
PGC-1α						PRDM16						UCP-1
Control	PA	PA+QC	PA+SLB			Control	PA	PA+QC	PA+SLB			Control	PA	PA+QC	PA+SLB
0.938926	0.366971	1.36602	1.25076			1.00362	0.870952	2.18159	1.88399			1.00318	0.875532	1.80862	1.67583
0.990802	0.298365	1.29372	1.26605			0.88855	0.837652	2.14296	1.76775			1.01583	0.845608	1.77793	1.64537
1.07027	0.318294	1.30535	1.19358			0.967735	0.8765	2.13284	1.8064			0.980987	0.780573	1.85386	1.55976

## Sheet: Figure 4a
CPT-1						ACO						PPARα
Control	PA	PA+QC	PA+SLB			Control	PA	PA+QC	PA+SLB			Control	PA	PA+QC	PA+SLB
0.968244	0.794589	1.86485	1.02373			0.92176	0.790392	2.74961	2.5821			1.21094	0.748082	1.49865	1.39724
1.16973	0.692131	1.82402	1.12182			0.924043	0.742987	2.6092	2.58306			0.880238	0.805646	1.84891	1.56773
0.882935	0.700568	1.68018	1.29176			1.17406	0.980467	2.60944	2.74357			0.93816	0.877121	2.47936	1.84057

[truncated: 4 more sheets: Figure 4b, Figure 4c, Figure 6a, Figure 6b]
