# Supplementary material for: Quercetin and silibinin ameliorate insulin resistance by stimulating fat browning via the β3-AR/AMPK pathway in palmitate-exposed 3T3-F442A adipocytes
Source: Research Square preprint supplement (doi:10.21203/rs.3.rs-7124697/v1), 2025-08-05
Supplement: Supplementary file 2 [file 6fb444e2769c3e5226a56a42.docx]

Table 1. List of primers used for real-time quantitative RT-PCR

| **Gene** | **Forward (5’ to 3’)** | **Reverse (5’ to 3’)** |
| --- | --- | --- |
| *β3-AR* | 5’-TGGTAGTGGGACTCCTCGTA-3’ | 5’-AGTTACACAGAGCACGTCCA-3’ |
| *PKA* | 5’-CAGGTGGATCTGACAAAGCG-3’ | 5’-CAGTCAGTTGTGGCAAACCA-3’ |
| *ATGL* | 5’-AGAACTCCACATCTGCTGCT-3’ | 5’-GACACCAGTTCACTGGGAGA-3’ |
| *UCP-1* | 5’-AAAGTCCGCCTTCAGATCCA-3’ | 5’-TGAGTCGTAGAGGCCAATCC-3’ |
| *PGC-1α* | 5’-TGCTGTGTGTCAGAGTGGAT-3’ | 5’-TACAGAGTCTTGGCTGCACA-3’ |
| *PRDM16* | 5’-CGTCCATCGCGGAGAAATAC-3’ | 5’-TTAGGCAGGAACTGGAAGGG-3’ |
| *Tmem26* | 5’-GAAAGAACACCGTGGAGACG-3’ | 5’-CTTGATCTGTGAGCCCTTGC-3’ |
| *Cited1* | 5’-TGCCACCGATTTATCGGACT-3’ | 5’-CAAGGTTGGAGTAGGCCAGA-3’ |
| *CD137* | 5’-GAGCTAACGAAGCAGGGTTG-3’ | 5’-CCGTCTAGAGAGCAGTTCGT-3’ |
| *Tbx1* | 5’-GTGGGACGAGTTCAATCAGC-3’ | 5’-ATCTACGGGCACAAAGTCCA-3’ |
| *Tfam* | 5’-GTTGTTGGATGGCATGGGTT-3’ | 5’-CGTGTAGAGCTCACGTCTCT-3’ |
| *Nrf1* | 5’-CAGTGATGTCCGCACAGAAG-3’ | 5’-CGGTCTGTGATGGTACGAGA-3’ |
| *PPARα* | 5’-GCATGTGAAGGCTGTAAGGG-3’ | 5’-TTGTGTGACATCCCGACAGA-3’ |
| *ACO* | 5’-CGTCATGAATCCCGATCTGC-3’ | 5’-TGGCTTCGAGTGAGGAAGTT-3’ |
| *CPT* | 5’-AGTCCTGCAACTTTGTGCTG-3’ | 5’-GGTGAGTCGACTGCCAGATA-3’ |
| *18s* | 5’-GTAACCCGTTGAACCCCATT-3’ | 5’-CCATCCAATCGGTAGTAGCG-3’ |
